# Supplementary material
Source: publisher site journal article supplement (https://www.dovepress.com/article/310619)
Supplement: Supplementary file 1 [file get_supplementary_file.php]

# Supplementary Material

## Supplementary Methods

### *Model population inputs*

The estimated number of treatment-eligible patients with relapsed/refractory multiple myeloma (RRMM) used in the budget impact model was informed by a recent epidemiology model in MM patients. The referenced epidemiology model was a compartmental model using differential equations to estimate patient population across five lines of therapy (LOT; LOT1, LOT2, LOT3, LOT4, and LOT5+). Patients transition over time across these LOTs with LOT transition defined as a change in therapy (due to progression, toxicity, or other reason). Each LOT had four further sub-compartments created based on stem cell transplant (SCT) and treatment type that included: SCT-eligible (patients who receive SCT); SCT-ineligible (patients who do not receive SCT); Anti-CD38 (patients who receive daratumumab treatment) and Other (patients who receive other types of treatments, excluding daratumumab).

The epidemiology model population was stratified into four sub-groups based on combinations of age and cytogenetic risk and included; <65 years with standard cytogenetic risk, <65 years with high cytogenetic risk, ≥65 years with standard cytogenetic risk and ≥65 years with high cytogenetic risk. Each of this sub-groups were then simulated, and the overall MM population was estimated by adding the specific sub-groups when the model reached a steady state.<sup>1</sup>

The anti-CD38 specific treatment pathways can therefore estimate the number of patients aged <65 years of age and who have received ≥4 prior LOTs, including a proteasome inhibitor, an immunomodulatory agent, and anti-CD38 monoclonal antibody; that is used as an input in the budget impact model for a hypothetical commercial plan.

## Supplementary Figure S1

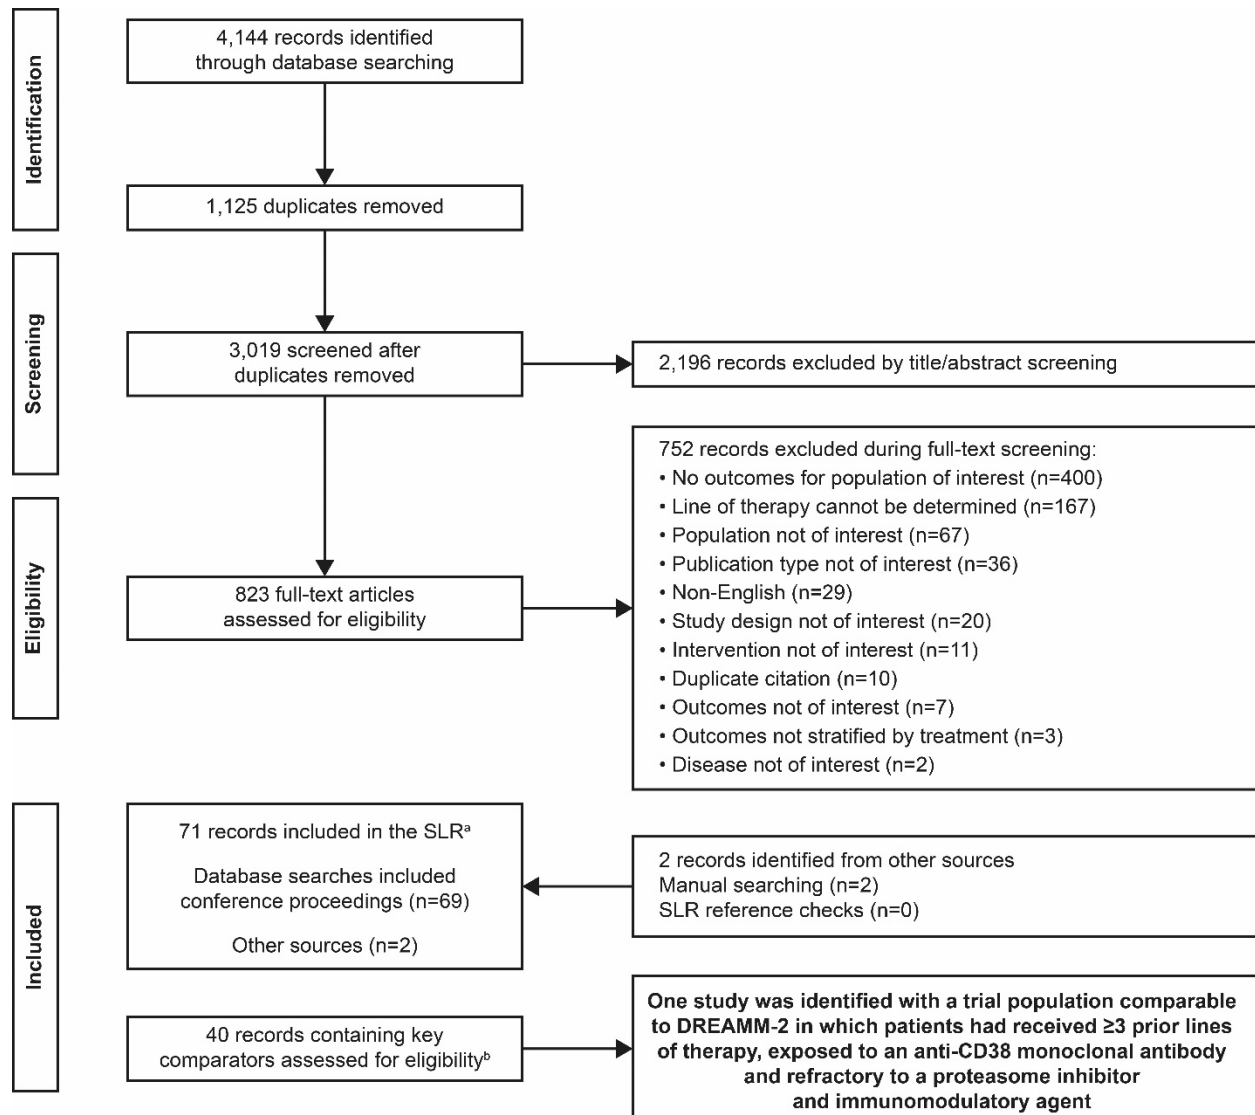

<sup>a</sup>The SLR included a wider scope than the inclusion criteria of the DREAMM-2 study in order to provide an overview of the treatment landscape. <sup>b</sup>Belantamab mafodotin key comparators included the following treatments therapies (administered as mono- or combination): bortezomib, carfilzomib, daratumumab, dexamethasone, elotuzumab, ixazomib, lenalidomide, pomalidomide, and selinexor.

**Abbreviations:** SLR, systematic literature review.

**Supplementary Table S1** Model inputs: AE management cost per episode

|                                | <b>Aggregate cost per episode<sup>a</sup></b> | <b>Source</b>                                                                                                                                                      |
|--------------------------------|-----------------------------------------------|--------------------------------------------------------------------------------------------------------------------------------------------------------------------|
| <b>Thrombocytopenia</b>        | \$1,075                                       | Roy 2015 <sup>2</sup> ; ICER 2016 <sup>3</sup> ; Durie 2013 <sup>4</sup> ; Jakubowiak 2016 <sup>5</sup> ; Pelligra 2017 <sup>6</sup> ; Ailawadhi 2019 <sup>7</sup> |
| <b>Neutropenia</b>             | \$1,732                                       | Roy 2015 <sup>2</sup> ; ICER 2016 <sup>3</sup> ; Durie 2013 <sup>4</sup> ; Jakubowiak 2016 <sup>5</sup> ; Pelligra 2017 <sup>6</sup> ; Ailawadhi 2019 <sup>7</sup> |
| <b>Anemia</b>                  | \$1,940                                       | Roy 2015 <sup>2</sup> ; ICER 2016 <sup>3</sup> ; Durie 2013 <sup>4</sup> ; Jakubowiak 2016 <sup>5</sup> ; Pelligra 2017 <sup>6</sup> ; Ailawadhi 2019 <sup>7</sup> |
| <b>Leukopenia</b>              | \$2,944                                       | Roy 2015 <sup>2</sup> ; Jakubowiak 2016 <sup>3</sup> ; Ailawadhi 2019 <sup>7</sup>                                                                                 |
| <b>Lymphopenia</b>             | \$2,999                                       | Roy 2015 <sup>2</sup> ; ICER 2016 <sup>3</sup> ; Jakubowiak 2016 <sup>5</sup> ; Ailawadhi 2019 <sup>7</sup>                                                        |
| <b>Nausea</b>                  | \$6,008                                       | ICER 2016 <sup>3</sup> ; Jakubowiak 2016 <sup>5</sup> ; Ailawadhi 2019 <sup>7</sup>                                                                                |
| <b>Diarrhea</b>                | \$6,061                                       | Roy 2015 <sup>2</sup> ; ICER 2016 <sup>3</sup> ; Durie 2013 <sup>4</sup> ; Jakubowiak 2016 <sup>5</sup> ; Ailawadhi 2019 <sup>7</sup>                              |
| <b>Keratopathy<sup>b</sup></b> | \$3,287                                       | GSK data on file <sup>8</sup>                                                                                                                                      |
| <b>Fatigue</b>                 | \$4,447                                       | Roy 2015 <sup>2</sup> ; ICER 2016 <sup>3</sup> ; Jakubowiak 2016 <sup>5</sup> ; Pelligra 2017 <sup>6</sup> ; Ailawadhi 2019 <sup>7</sup>                           |
| <b>Pneumonia</b>               | \$16,355                                      | Roy 2015 <sup>2</sup> ; ICER 2016 <sup>3</sup> ; Durie 2013 <sup>4</sup> ; Jakubowiak 2016 <sup>5</sup> ; Ailawadhi 2019 <sup>7</sup>                              |
| <b>Hypercalcemia</b>           | \$187                                         | Roy 2015 <sup>2</sup> (assumption: same cost as hypocalcemia)                                                                                                      |
| <b>Hypophosphatemia</b>        | \$187                                         | Roy 2015 <sup>2</sup>                                                                                                                                              |
| <b>Hyponatremia</b>            | \$187                                         | Roy 2015 <sup>2</sup>                                                                                                                                              |
| <b>Hypokalemia</b>             | \$1,924                                       | Roy 2015 <sup>2</sup>                                                                                                                                              |
| <b>Mental status changes</b>   | \$8,157                                       | HCUP 2016 <sup>9</sup>                                                                                                                                             |

**Notes:** <sup>a</sup>Costs with multiple sources reported are the average of costs per episode reported across the listed publications; <sup>b</sup>Cost for keratopathy is calculated based on the amount paid per encounter plus the COB per encounter. It is derived as the sum of values (patient cost-share is excluded). The sum was then inflated to \$2019 value using an inflation factor of 1.0173.

All costs were inflated to 2019 US dollars prior to deriving an average.

**Abbreviations** AE, adverse event; COB, coordination of benefit; HCUP, Healthcare Cost and Utilization Project; ICER, Institute for Clinical and Economic Review.

**Supplementary Table S2** Model inputs for sensitivity analysis

| Parameter                                       | Base case value | Lower bound value | Upper bound value |
|-------------------------------------------------|-----------------|-------------------|-------------------|
| <b>Epidemiology</b>                             |                 |                   |                   |
| Patients entering model in 2020, N              | 11              | 9                 | 13                |
| Patients entering model in 2021, N              | 11              | 9                 | 13                |
| Patients entering model in 2022, N              | 11              | 9                 | 13                |
| <b>Market share</b>                             |                 |                   |                   |
| Belamaf uptake in 2020                          | 32.0%           | 25.6%             | 38.4%             |
| Belamaf uptake in 2021                          | 32.0%           | 25.6%             | 38.4%             |
| Belamaf uptake in 2022                          | 32.0%           | 25.6%             | 38.4%             |
| <b>Treatment duration, mean months</b>          |                 |                   |                   |
| Belamaf                                         | 2.99            | 1.33              | 4.65              |
| SEL+DEX                                         | 2.99            | 1.03              | 4.94              |
| <b>Drug acquisition costs<sup>a</sup></b>       | Multiple inputs | 20.0%             | 20.0%             |
| <b>Drug administration costs<sup>a</sup></b>    | Multiple inputs | 20.0%             | 20.0%             |
| <b>Concomitant medication costs<sup>a</sup></b> | Multiple inputs | 20.0%             | 20.0%             |
| <b>Treatment monitoring costs<sup>a</sup></b>   | Multiple inputs | 20.0%             | 20.0%             |
| <b>AE management costs<sup>a</sup></b>          | Multiple inputs | 20.0%             | 20.0%             |

AE, adverse event; belamaf, belantamab mafodotin; DEX, dexamethasone; SEL, selinexor.

<sup>a</sup>For all comparators: factor for lower and upper bound (increases and decreases in the base case value, respectively).

**Supplementary Table S3** Scenario analysis: Commercial payer estimated costs over 3-year time horizon by regimen for patients who received  $\geq 3$  prior therapies<sup>a</sup>

| Outcomes                              | Current market     | Future market      | Difference<br>(future market – current market) | % Change      |
|---------------------------------------|--------------------|--------------------|------------------------------------------------|---------------|
| <b>Treatment eligible patients, N</b> | <b>48</b>          | <b>48</b>          | <b>0</b>                                       | <b>0.0%</b>   |
| <b>Patients receiving belamaf, N</b>  | <b>0</b>           | <b>15</b>          | <b>15</b>                                      | <b>-</b>      |
| <b>Drug acquisition</b>               | <b>\$2,373,729</b> | <b>\$2,395,304</b> | <b>\$21,575</b>                                | <b>0.9%</b>   |
| Belamaf                               | \$0                | \$1,105,356        | \$1,105,356                                    | -             |
| SEL+DEX                               | \$2,167,562        | \$1,083,781        | -\$1,083,781                                   | -50.0%        |
| BSC only                              | \$206,167          | \$206,167          | \$0                                            | 0.0%          |
| <b>Drug administration</b>            | <b>\$0</b>         | <b>\$35,799</b>    | <b>\$35,799</b>                                | <b>-</b>      |
| Belamaf                               | \$0                | \$35,799           | \$35,799                                       | -             |
| SEL+DEX                               | \$0                | \$0                | \$0                                            | -             |
| BSC only                              | \$0                | \$0                | \$0                                            | -             |
| <b>Concomitant medication</b>         | <b>\$947</b>       | <b>\$729</b>       | <b>-\$218</b>                                  | <b>-23.1%</b> |
| Belamaf                               | \$0                | \$255              | \$255                                          | -             |
| SEL+DEX                               | \$947              | \$474              | -\$474                                         | -50.0%        |
| BSC only                              | \$0                | \$0                | \$0                                            | -             |
| <b>Treatment monitoring</b>           | <b>\$27,685</b>    | <b>\$39,085</b>    | <b>\$11,400</b>                                | <b>41.2%</b>  |
| Belamaf                               | \$0                | \$25,243           | \$25,243                                       | -             |
| SEL+DEX                               | \$27,685           | \$13,842           | -\$13,842                                      | -50.0%        |
| BSC only                              | \$0                | \$0                | \$0                                            | -             |
| <b>AE management</b>                  | <b>\$320,135</b>   | <b>\$233,486</b>   | <b>-\$86,648</b>                               | <b>-27.1%</b> |
| Belamaf                               | \$0                | \$73,419           | \$73,419                                       | -             |
| SEL+DEX                               | \$320,135          | \$160,067          | -\$160,067                                     | -50.0%        |
| BSC                                   | \$0                | \$0                | \$0                                            | -             |
| <b>Subsequent treatment</b>           | <b>\$314,333</b>   | <b>\$314,333</b>   | <b>\$0</b>                                     | <b>0.0%</b>   |
| Belamaf                               | \$0                | \$157,167          | \$157,167                                      | -             |
| SEL+DEX                               | \$314,333          | \$157,167          | -\$157,167                                     | -50.0%        |
| BSC only                              | \$0                | \$0                | \$0                                            | -             |
| <b>Total cost</b>                     | <b>\$3,036,829</b> | <b>\$3,018,736</b> | <b>-\$18,093</b>                               | <b>-0.6%</b>  |
| Belamaf                               | \$0                | \$1,397,238        | \$1,397,238                                    | -             |
| SEL+DEX                               | \$2,830,662        | \$1,415,331        | -\$1,415,331                                   | -50.0%        |
| BSC only                              | \$206,167          | \$206,167          | \$0                                            | 0.0%          |

**Notes:** <sup>a</sup>Including an anti-CD38 monoclonal antibody, a proteasome inhibitor, and an immunomodulatory agent.

**Abbreviations:** AE, adverse event; belamaf, belantamab mafodotin; BSC, best supportive care; DEX, dexamethasone; SEL, selinexor.

**Supplementary Table S4** Scenario analysis: Commercial and Medicare budget impact outcomes over 3-year time horizon for patients who received ≥3 prior therapies<sup>a</sup>

| <b>Outcomes<sup>a</sup></b>         | <b>Current market</b> | <b>Future market</b> | <b>Difference<br/>(future market – current market)</b> | <b>% Change</b> |
|-------------------------------------|-----------------------|----------------------|--------------------------------------------------------|-----------------|
| <b>Commercial payer perspective</b> |                       |                      |                                                        |                 |
| Total cost PMPM                     | \$0.08                | \$0.08               | -\$0.0005                                              | -0.6%           |
| Total cost PTMPM                    | \$5,352.73            | \$5,320.83           | -\$31.89                                               | -0.6%           |
| Total cost PMPY                     | \$1.01                | \$1.01               | -\$0.01                                                | -0.6%           |
| Total cost PTMPY                    | \$64,232.70           | \$63,850.02          | -\$382.68                                              | -0.6%           |
| <b>Medicare perspective</b>         |                       |                      |                                                        |                 |
| Total cost PMPM                     | \$0.27                | \$0.26               | -\$0.0046                                              | -1.7%           |
| Total cost PTMPM                    | \$5,322.35            | \$5,230.90           | -\$91.45                                               | -1.7%           |
| Total cost PMPY                     | \$3.20                | \$3.14               | -\$0.05                                                | -1.7%           |
| Total cost PTMPY                    | \$63,868.22           | \$62,770.83          | -\$1,097.39                                            | -1.7%           |

**Notes:** <sup>a</sup>Including an anti-CD38 monoclonal antibody, a proteasome inhibitor, and an immunomodulatory agent.

**Abbreviations:** PMPM, per member per month; PTMPM, per treated member per month; PMPY, per member per year; PTMPY, per treated member per year.

## References

1. Nikolaou A, Maiese E, Samyshkin Y, Sansbury L, Oguz M, Cid Ruzafa J, Sapra S, Kapoor R, Wang F. Estimating the Number of US Patients with Multiple Myeloma at 5 or More Lines of Treatment (LOT). International Society for Pharmacoeconomics and Outcomes Research; 16-19 November 2020, 2020; Virtual
2. Roy A, Kish JK, Bloudek L, et al. Estimating the Costs of Therapy in Patients with Relapsed and/or Refractory Multiple Myeloma: A Model Framework. *Am Health Drug Benefits*. 2015;8(4):204-215.
3. Institute for Clinical and Economic Review (ICER). Treatment Options for Relapsed or Refractory Multiple Myeloma: Effectiveness, Value, and Value-Based Price Benchmarks. Final Evidence Report and Meeting Summary. 2016; <https://icer-review.org/announcements/mm-final-report/> Accessed 7 October 2020.
4. Durie B, Binder G, Pashos C, Khan Z, Hussein M, Borrello I. Total cost comparison in relapsed/refractory multiple myeloma. *J Med Econ*. 2013;16(5):614-622.
5. Jakubowiak AJ, Campioni M, Benedict Á, et al. Cost-effectiveness of adding carfilzomib to lenalidomide and dexamethasone in relapsed multiple myeloma from a US perspective. *J Med Econ*. 2016;19(11):1061-1074.
6. Pelligra CG, Parikh K, Guo S, et al. Cost-effectiveness of Pomalidomide, Carfilzomib, and Daratumumab for the Treatment of Patients with Heavily Pretreated Relapsed-refractory Multiple Myeloma in the United States. *Clin Ther*. 2017;39(10):1986-2005.e1985.
7. Ailawadhi S, DerSarkissian M, Duh MS, et al. Cost Offsets in the Treatment Journeys of Patients With Relapsed/Refractory Multiple Myeloma. *Clin Ther*. 2019;41(3):477-493.e477.
8. GlaxoSmithKline data on file 10 August 2020; #2020N430957\_01. BCMA RWD439: Truven Ophthalmology Costs.
9. HCUPnet. Weighted national estimates from HCUP National Inpatient Sample (NIS), 2016, Agency for Healthcare Research and Quality (AHRQ), based on data collected by individual States and provided to AHRQ by the States. Statistics by Principal Diagnosis and Payer (insurance status). 2016; <https://www.hcup-us.ahrq.gov/nisoverview.jsp>. Accessed 7 October 2020.
